# Supplementary material
Source: PubMed Central journal article supplement (PMC4442537)

Figure S1. RAxML maximum likelihood tree for the Mississippi Migratory Flyway (MMF) PB2 isolate segments collected in this study from July 2008 – February 2011. Tree topology was used in the Slatkin & Maddison tests for genetic structure within the MMF. Isolate branches are color coded by geographic category distinction for testing (North-Blue;South-Red) with bootstrap support for branch labels. The same North-South category distinctions were used in the discrete phylogeographic analysis.

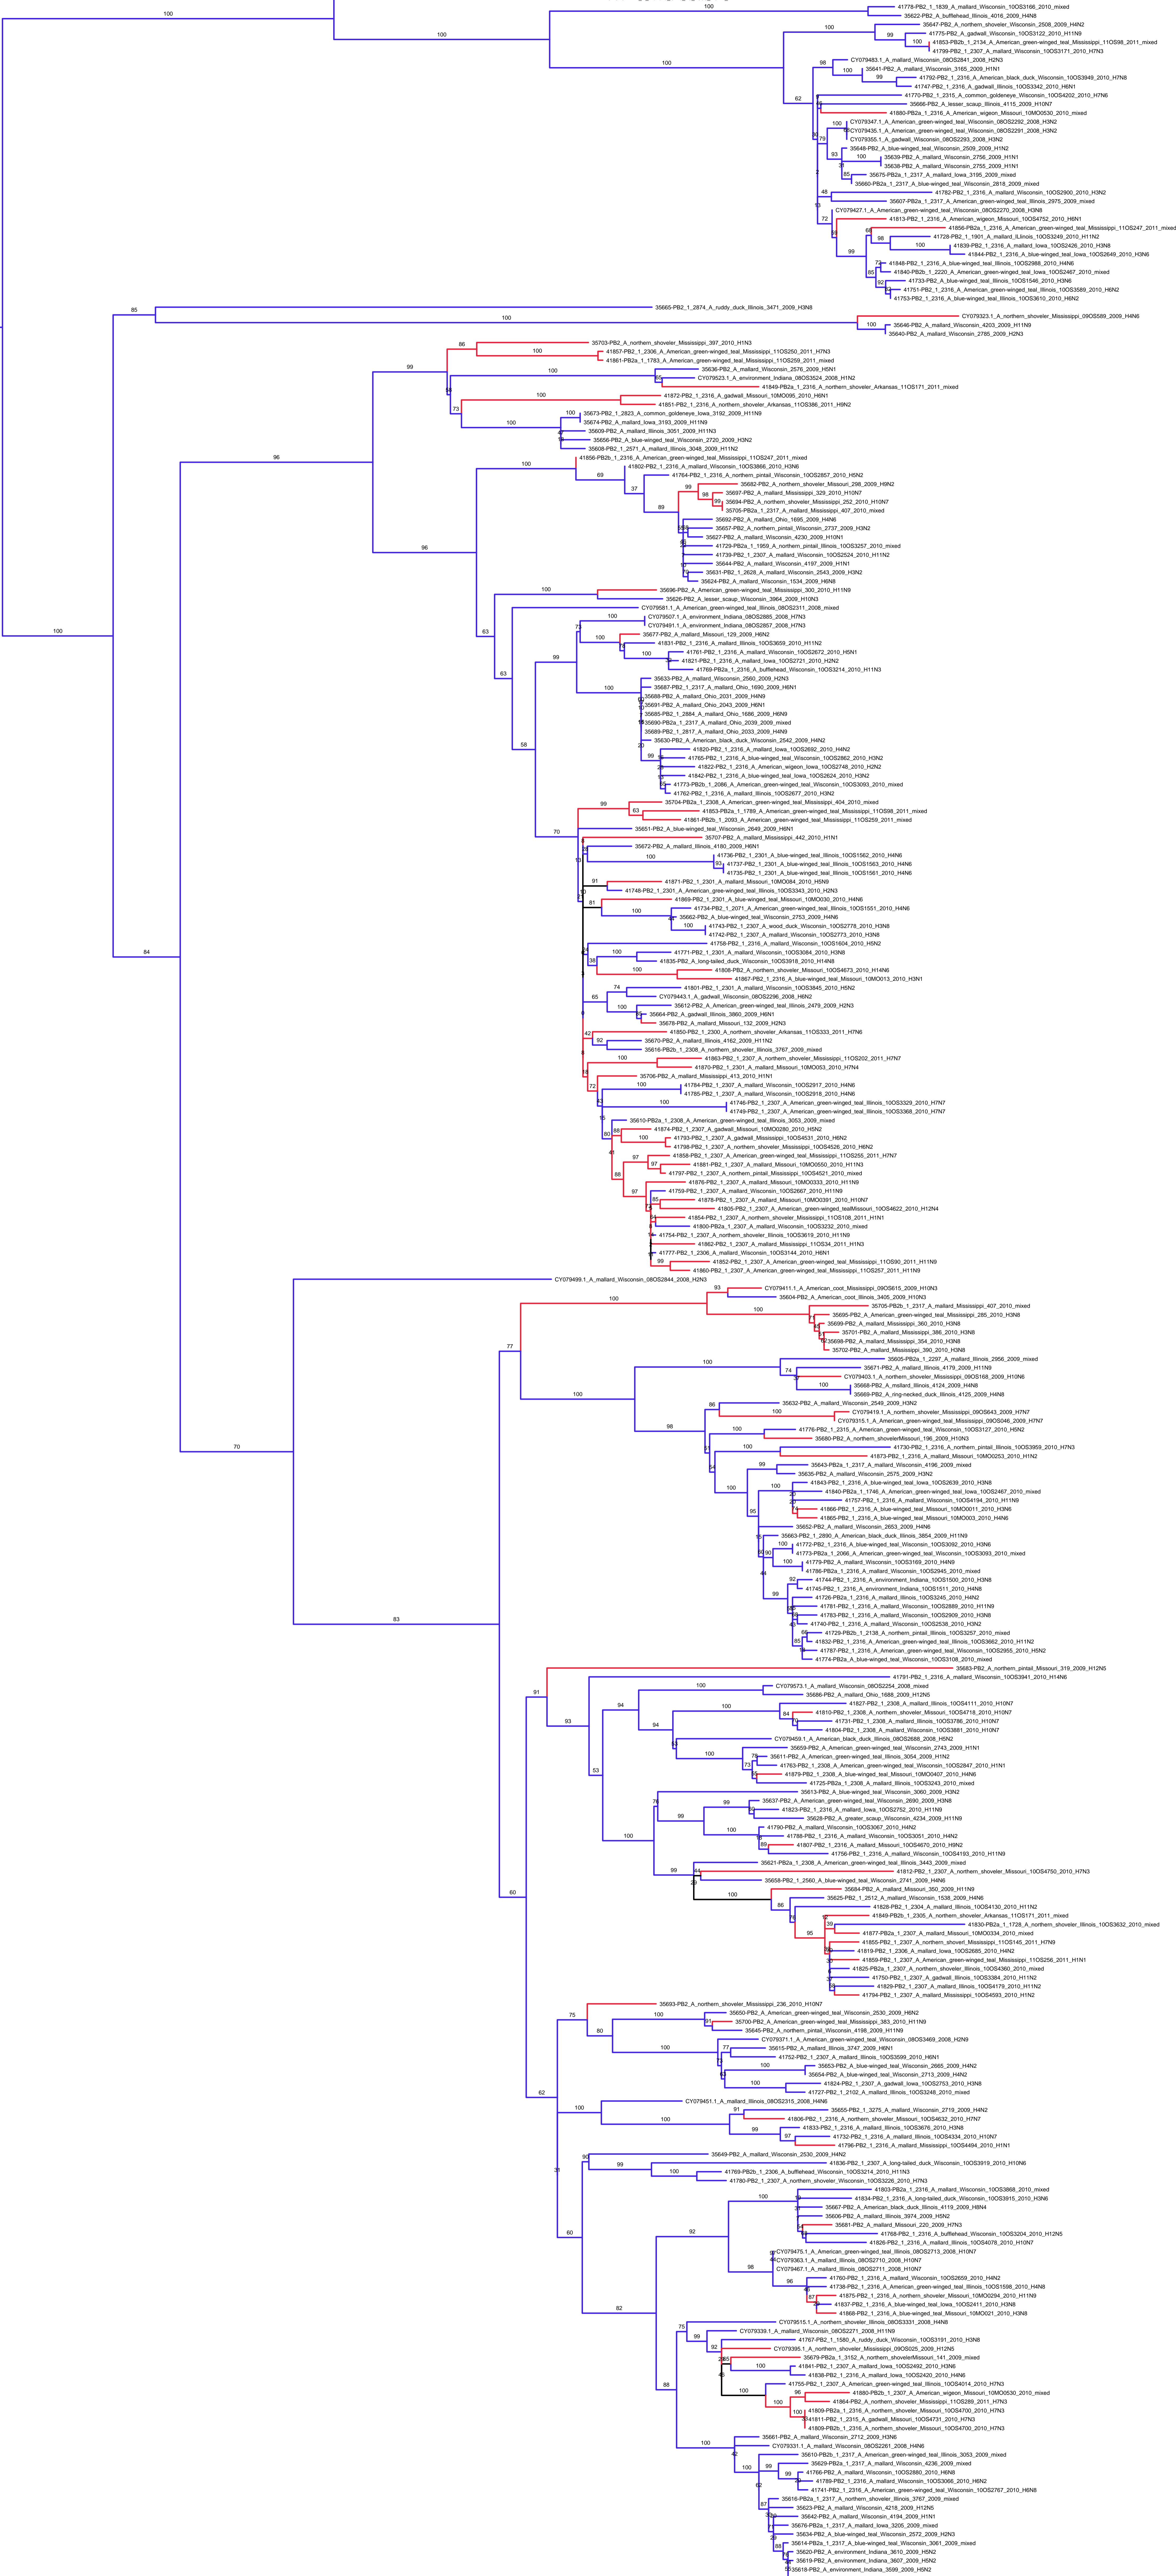

Figure S2. RAxML maximum likelihood tree for the Mississippi Migratory Flyway (MMF) PB1 isolate segments collected in this study from July 2008 – February 2011. Tree topology was used in the Slatkin & Maddison tests for genetic structure within the MMF. Isolate branches are color coded by geographic category distinction for testing (North-Blue;South-Red) with bootstrap support for branch labels. The same North-South category distinctions were used in the discrete phylogeographic analysis.

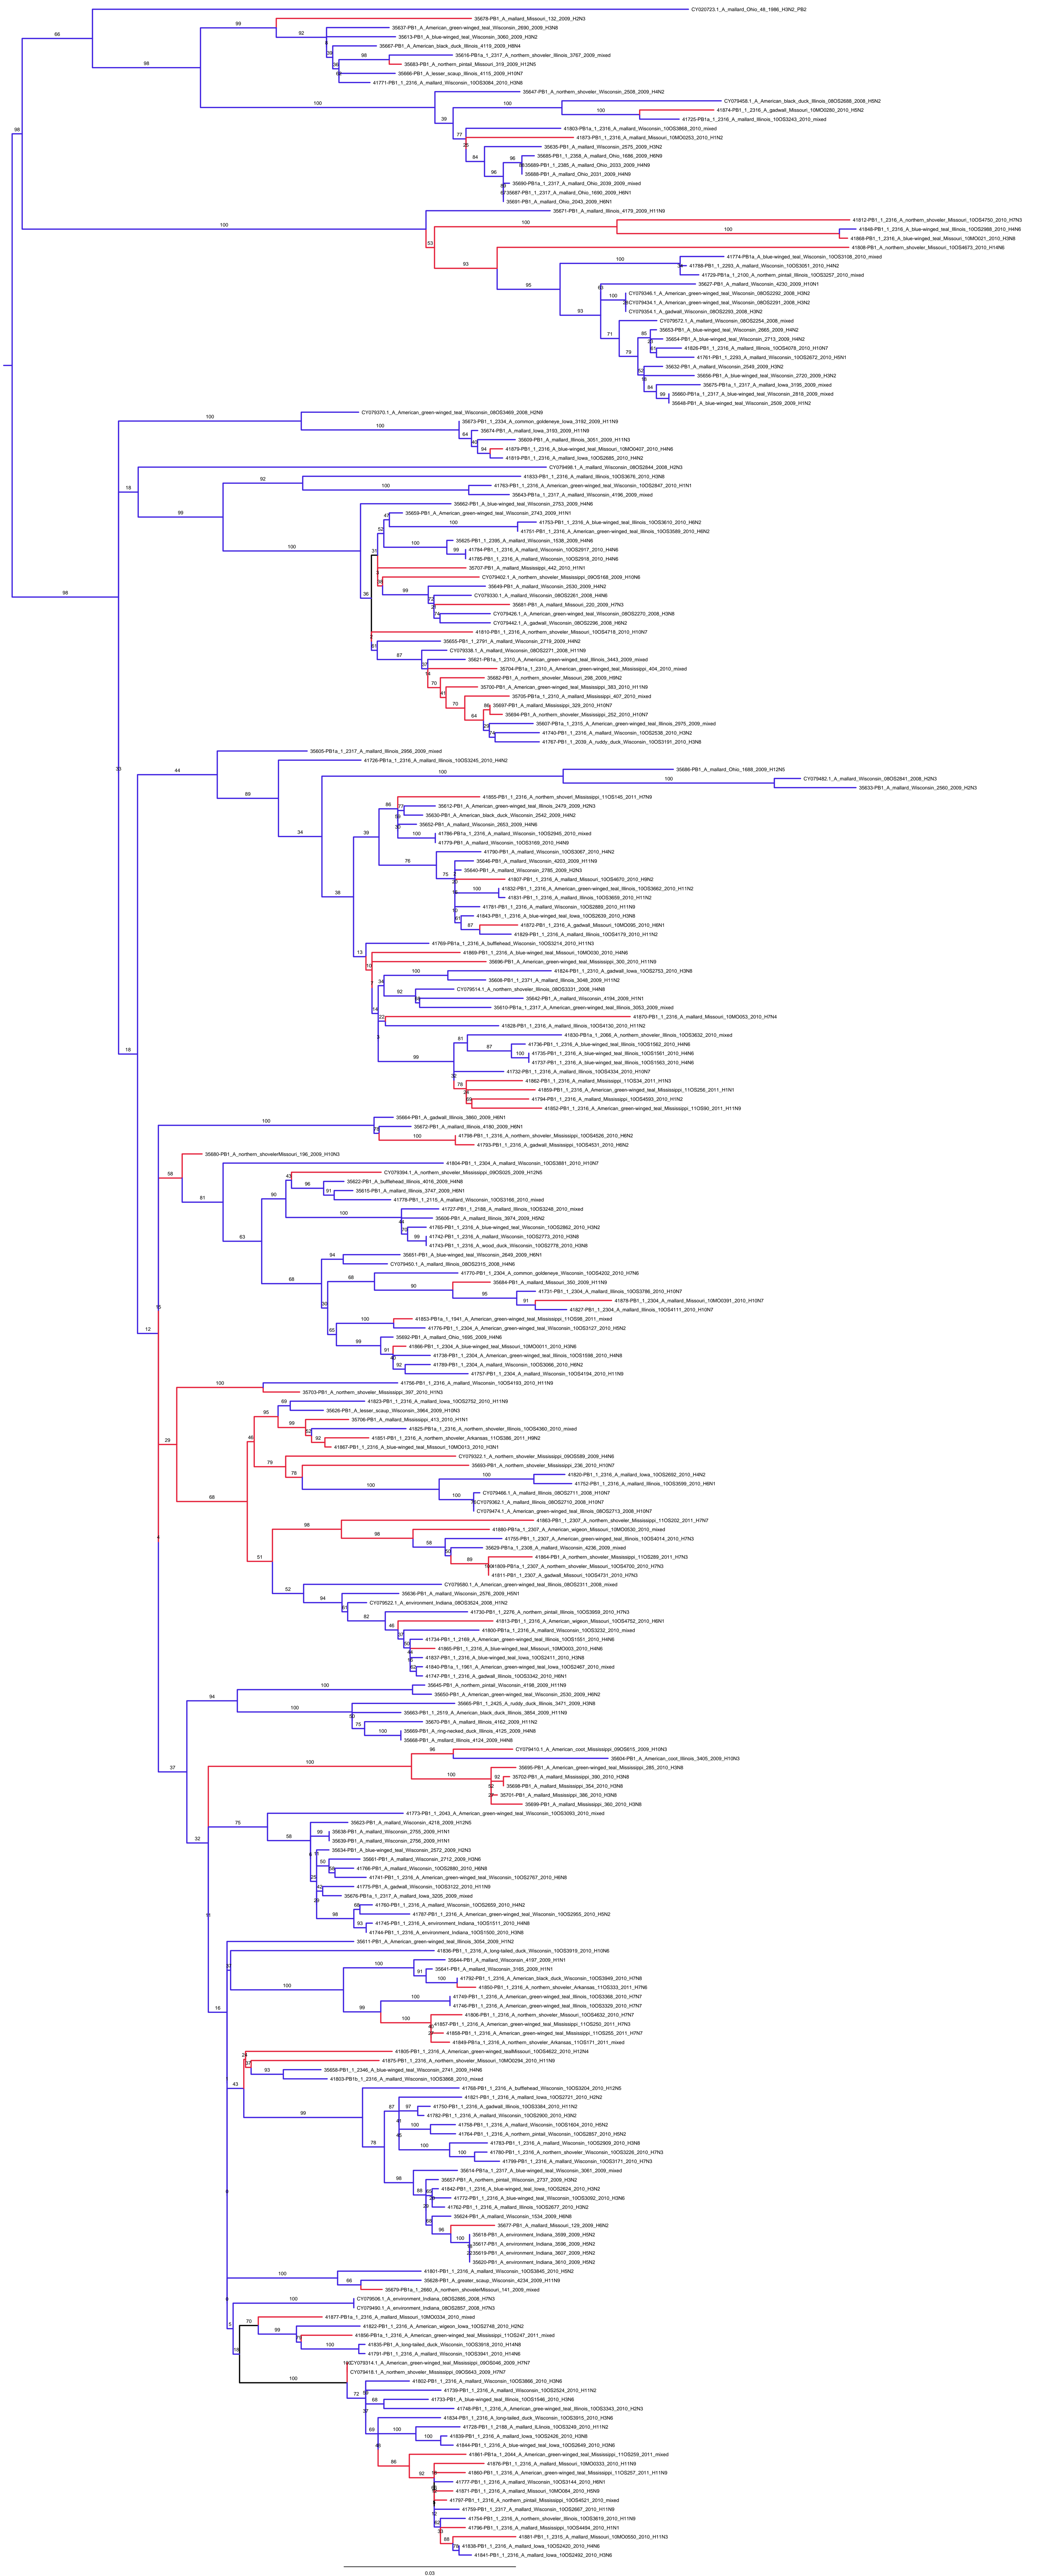

Figure S3. RAxML maximum likelihood tree for the Mississippi Migratory Flyway (MMF) PA isolate segments collected in this study from July 2008 – February 2011. Tree topology was used in the Slatkin & Maddison tests for genetic structure within the MMF. Isolate branches are color coded by geographic category distinction for testing (North-Blue;South-Red) with bootstrap support for branch labels. The same North-South category distinctions were used in the discrete phylogeographic analysis.

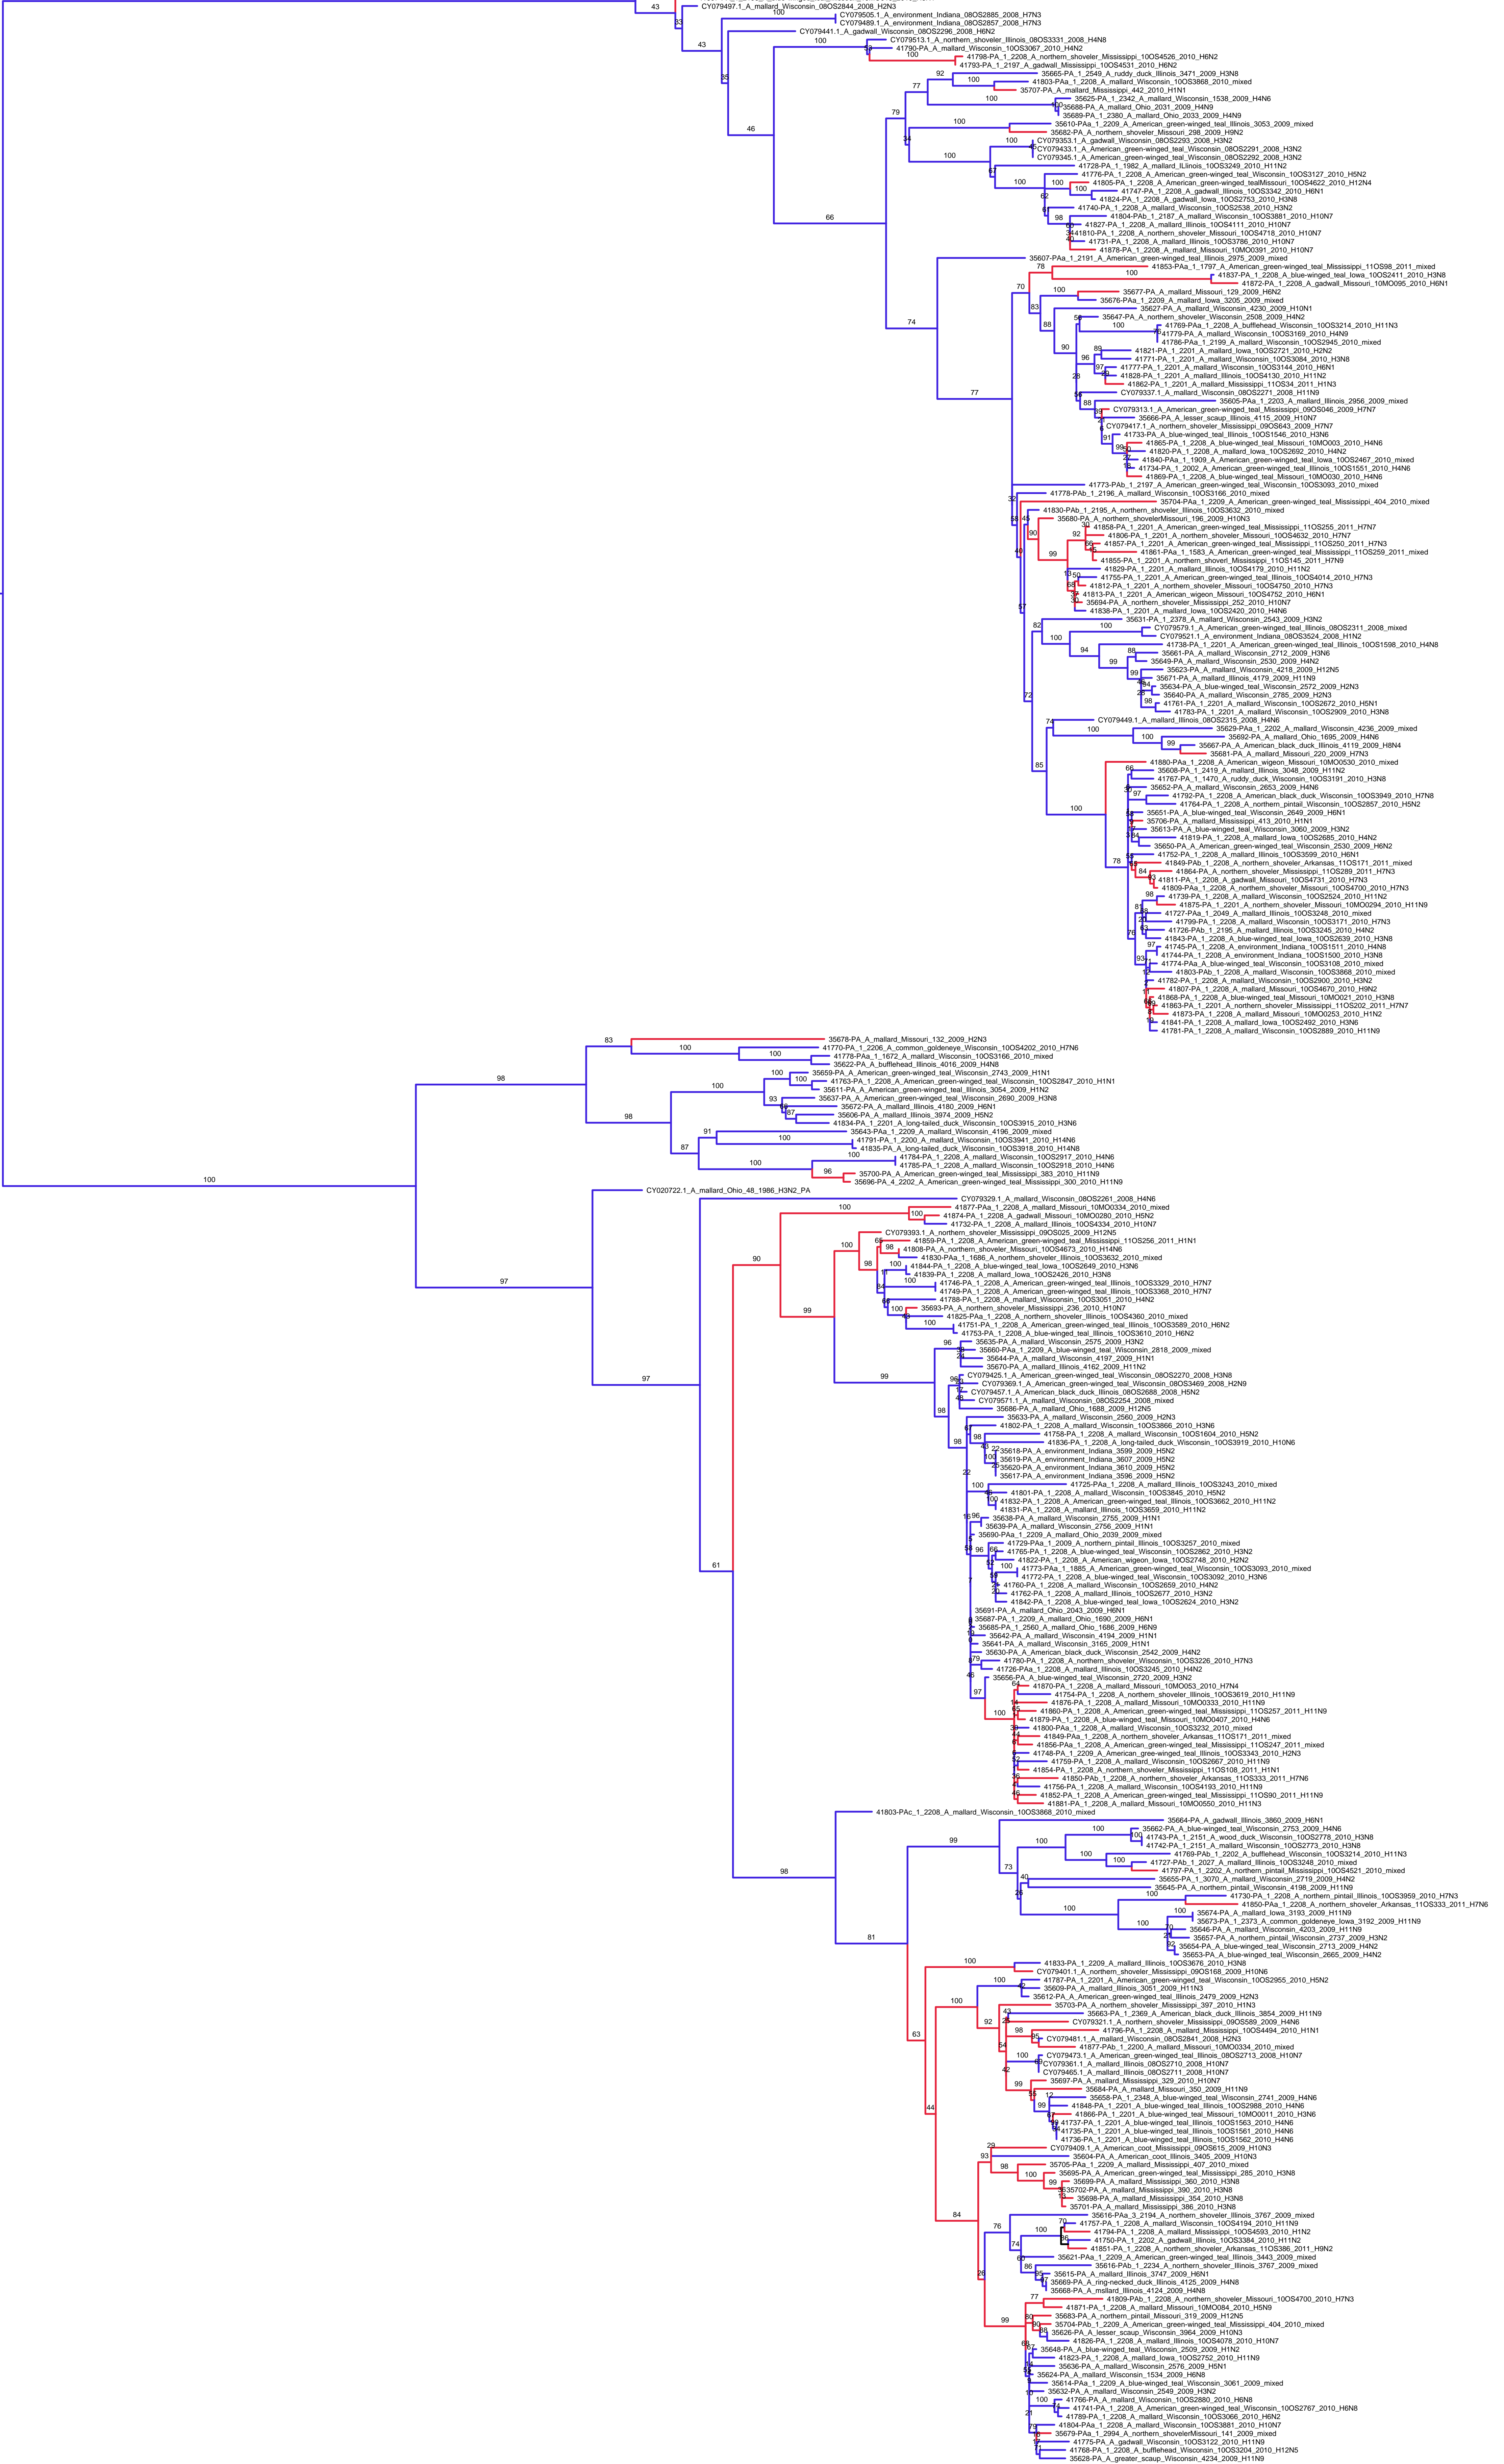

Figure S4. RAxML maximum likelihood tree for the Mississippi Migratory Flyway (MMF) NP isolate segments collected in this study from July 2008 – February 2011. Tree topology was used in the Slatkin & Maddison tests for genetic structure within the MMF. Isolate branches are color coded by geographic category distinction for testing (North-Blue;South-Red) with bootstrap support for branch labels. The same North-South category distinctions were used in the discrete phylogeographic analysis.

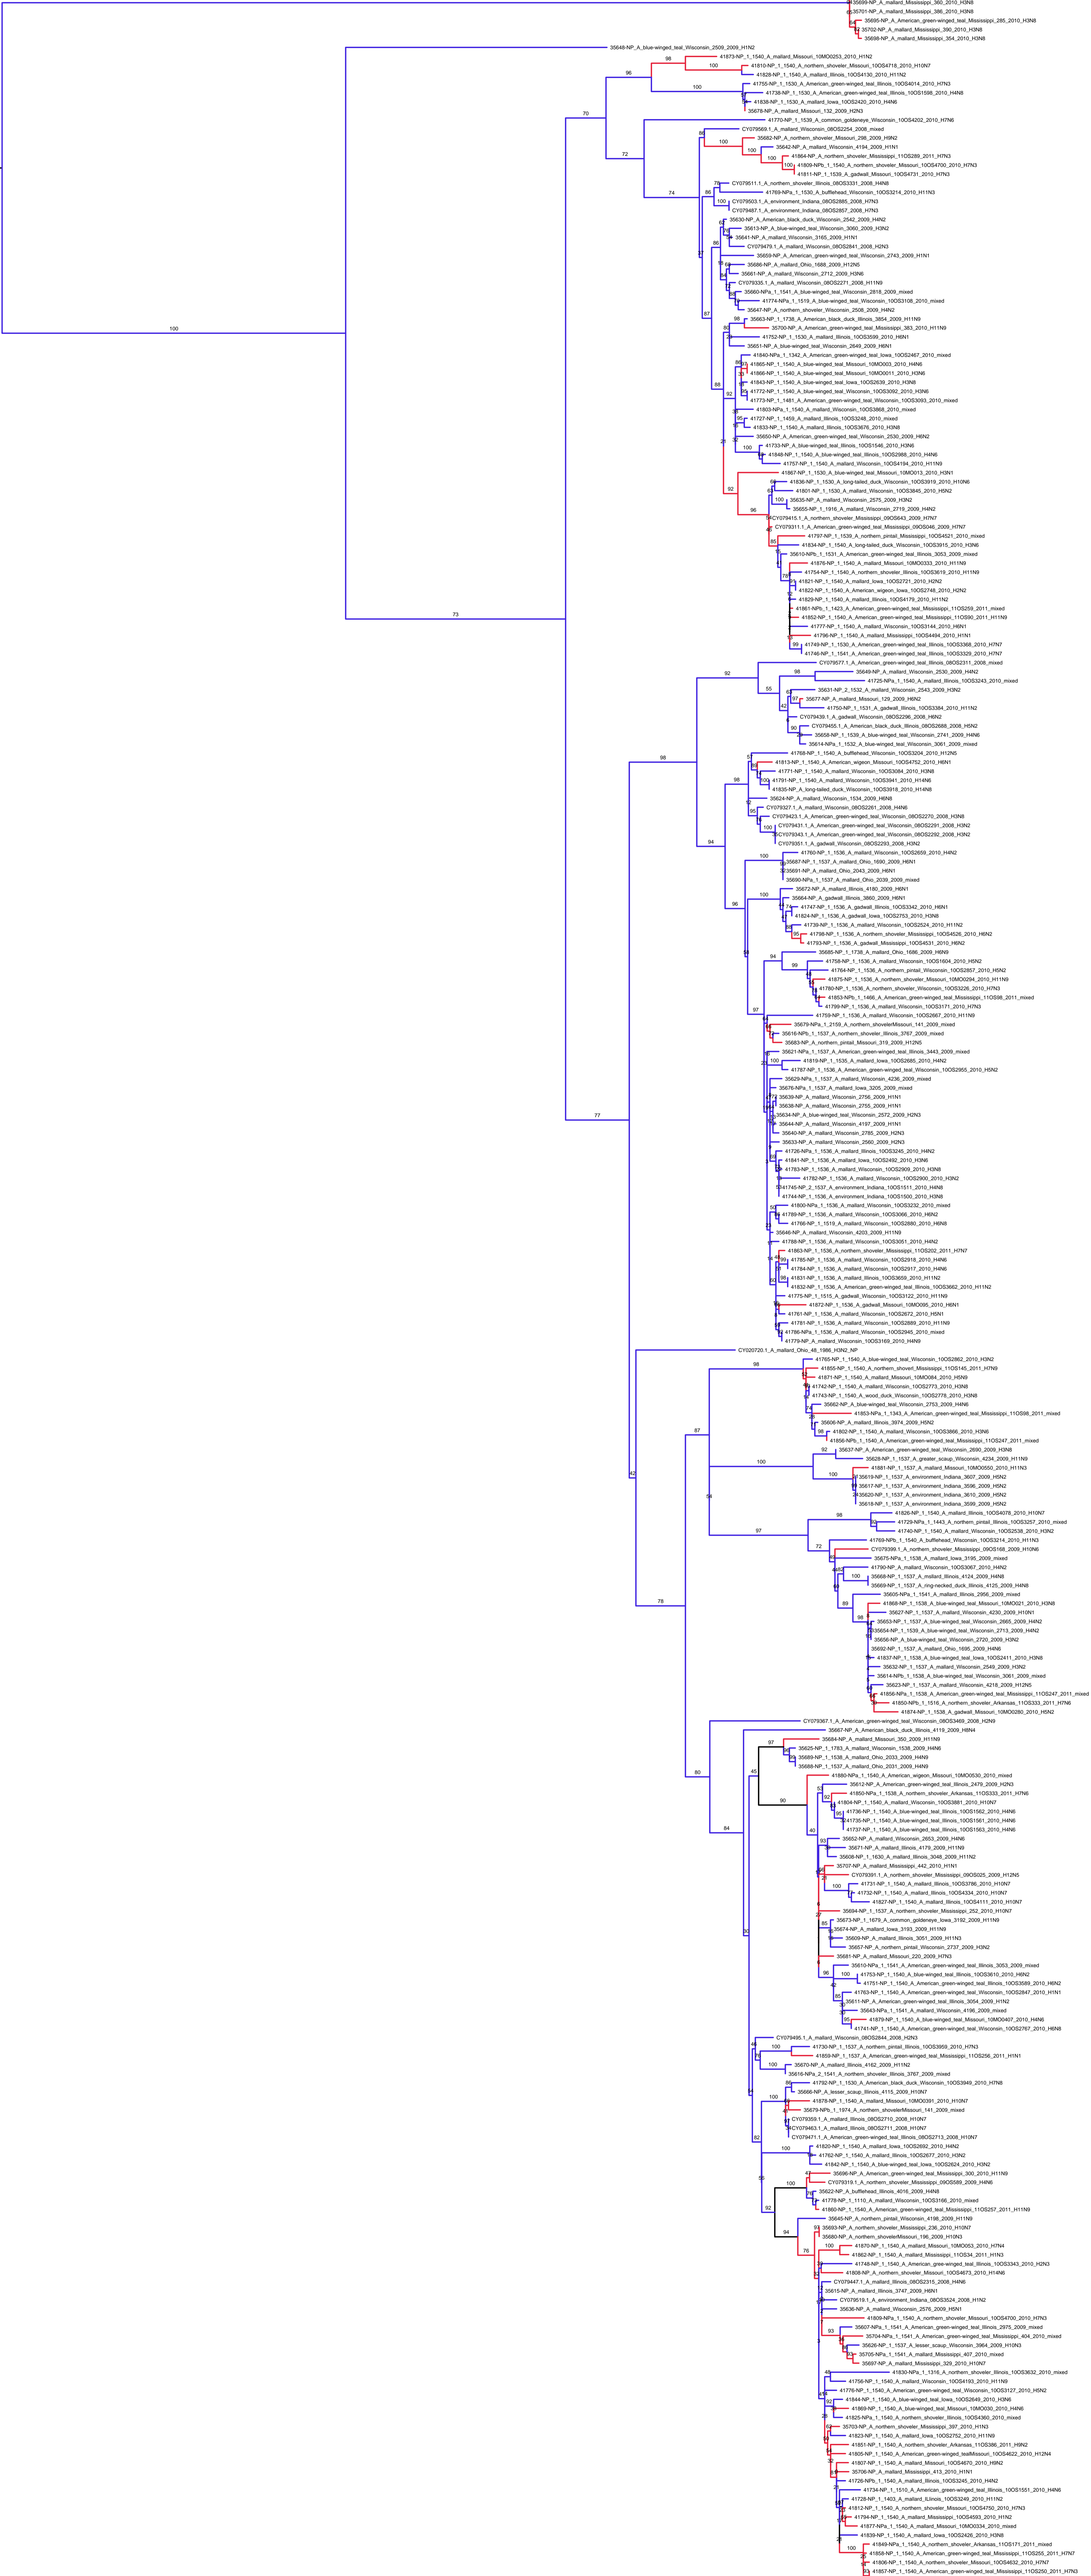

100

100

100

100

100

100

100

100

100

100



Figure S5. RAxML maximum likelihood tree for the Mississippi Migratory Flyway (MMF) MP isolate segments collected in this study from July 2008 – February 2011. Tree topology was used in the Slatkin & Maddison tests for genetic structure within the MMF. Isolate branches are color coded by geographic category distinction for testing (North-Blue;South-Red) with bootstrap support for branch labels. The same North-South category distinctions were used in the discrete phylogeographic analysis.

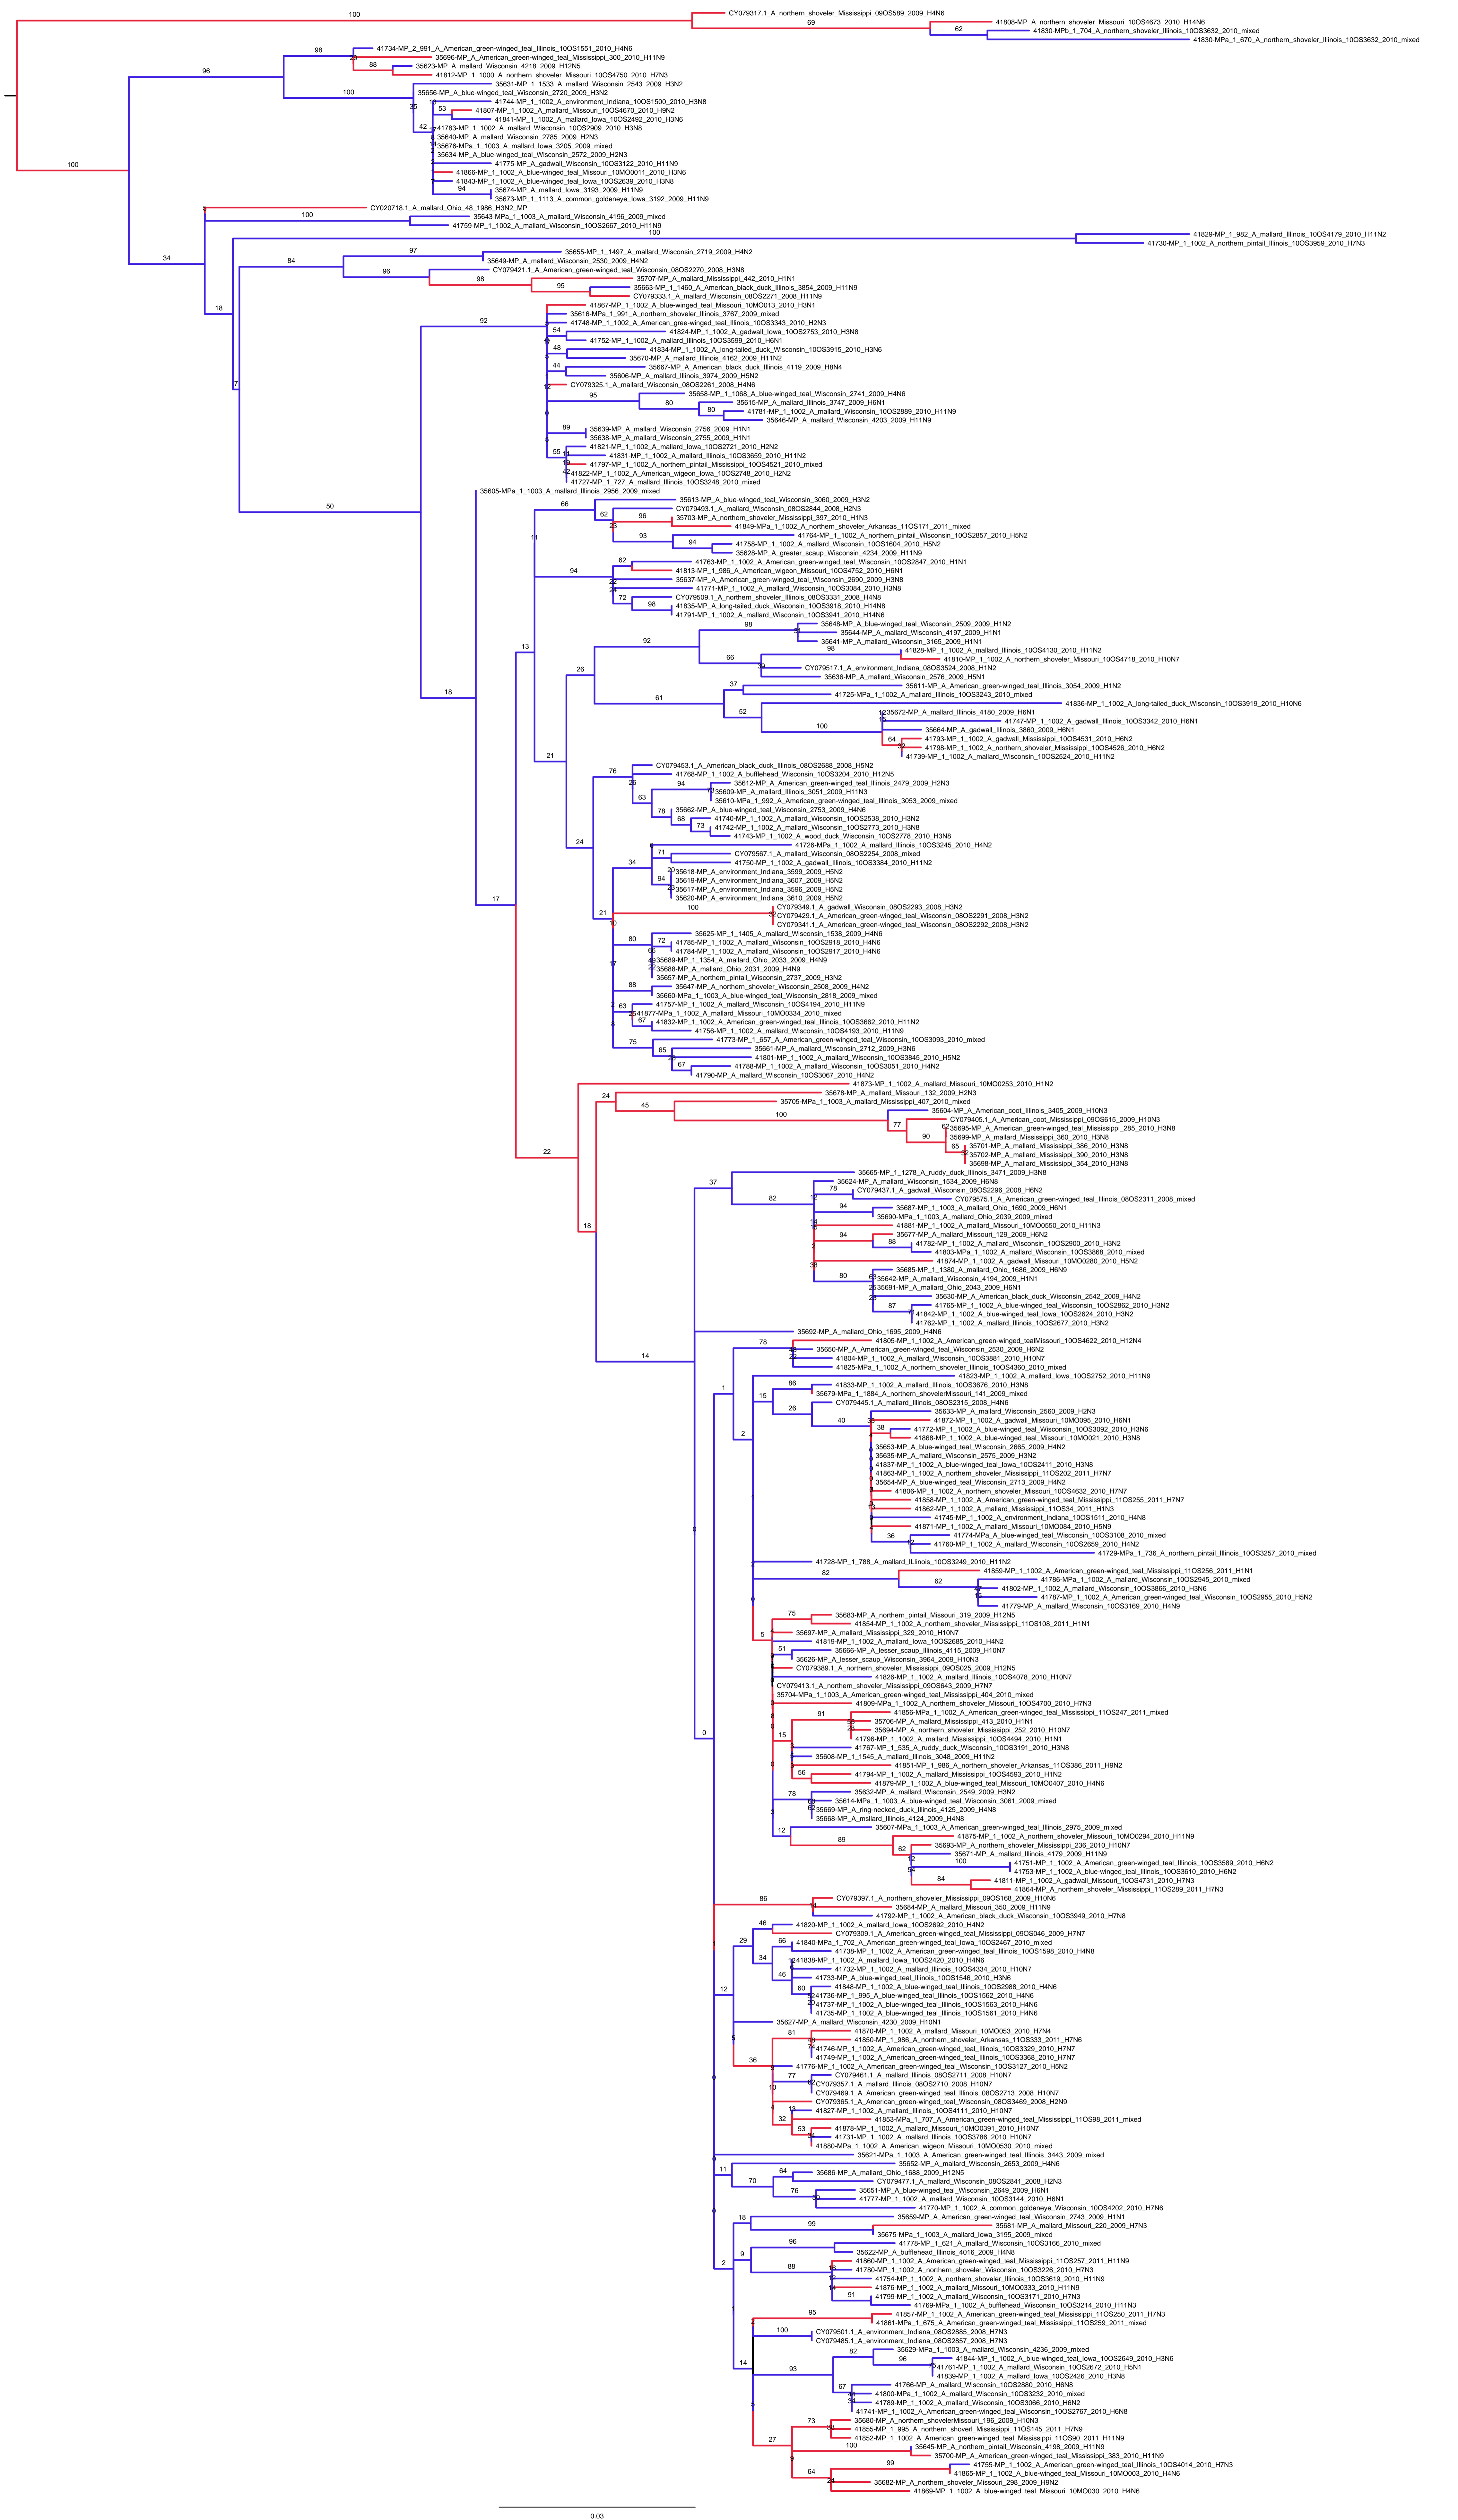

Supplement: JVI.03249-14_zjv999090354so1.pdf [file JVI.03249-14_zjv999090354so1.pdf]
